# Supplementary material
Source: publisher figshare collection journal article supplement (https://gsajournals.figshare.com/ndownloader/files/23743061)
Supplement: Supplementary file 1 [file 23743061]

**Table S1**: Strains used in this study

| Strain | Genotype | Ref |
| --- | --- | --- |
| N2 | Wild type Bristol |  |
| CL2166 | *dvIs19 [(pAF15) gst-4p::GFP::NLS] III* | (1) |
| MT3179 | *sem-4(n1378) I* | (2) |
| MT5825 | *sem-4(n1971) I* | (2) |
| OP57 | *unc-119(ed3) III;wgIs57* [*sem-4*::TY1::EGFP::3xFLAG(92C12) + *unc-119(+)*] | (3 |
| YF15 | *brap-2(ok1492) II* | (4) |
| YF67 | *brap-2(ok1492);dvIs19* | (5) |
| YF162 | *sem-4(n1378);brap-2(ok1492);dvIs19* | This study |
| YF163 | *sem-4(n1378);dvIs19* | This study |
| YF167 | *sem-4(n1378);brap-2(ok1492);* | This study |
| YF168 | *brap-2(ok1492);wgIs57* | This study |
| YF174 | *sem-4(n1971);brap-2(ok1492)* | This study |
| YF175 | *sem-4(n1971);dvIs19* | This study |
| YF176 | *sem-4(n1971);brap-2(ok1492);dvIs19* | This study |

References:

1. Link, C. D., and Johnson, C. J. (2002) Reporter transgenes for study of oxidant stress in Caenorhabditis elegans. *Methods Enzymol.* **353**, 497–505

2. Basson, M., and Horvitz, H. R. (1996) The Caenorhabditis elegans gene sem-4 controls neuronal and mesodermal cell development and encodes a zinc finger protein. *Genes Dev.* **10**, 1953–1965

3. Gerstein, M. B., Lu, Z. J., Van Nostrand, E. L., Cheng, C., Arshinoff, B. I., et al. (2010) Integrative analysis of the Caenorhabditis elegans genome by the modENCODE project. *Science*. **330**, 1775–1787

4. Koon, J. C., and Kubiseski, T. J. (2010) Developmental arrest of Caenorhabditis elegans BRAP-2 mutant exposed to oxidative stress is dependent on BRC-1. *J. Biol. Chem.* **285**, 13437–13443

5. Hu, Q., D’Amora, D. R., MacNeil, L. T., Walhout, A. J. M., and Kubiseski, T. J. (2017) The Oxidative Stress Response in Caenorhabditis elegans Requires the GATA Transcription Factor ELT-3 and SKN-1/Nrf2. *Genetics*. **206**, 1909–1922
